# Supplementary material
Source: publisher figshare collection journal article supplement (https://acs.figshare.com/ndownloader/files/4663777)
Supplement: Supplementary file 1 [file 4663777]

data_global 
_audit_creation_date        07-08-28
_audit_creation_method CRYSTALS_ver_12.85

_oxford_structure_analysis_title  'new in P 21/c'
_chemical_name_systematic         ?
_chemical_melting_point           ?

_publ_contact_author_name         'MONGIN, Florence' 
_publ_contact_author_email        'florence.mongin@univ-rennes1.fr' 
_publ_contact_author_address
;     Synth\`ese et Electrosynth\`ese Organique
 UMR 6510 CNRS, Universit\'e de Rennes 1
 Avenue du G\'en\'eral Leclerc
 35042 Rennes Cedex, France.
;
_publ_requested_journal           'Journal of Organic Chemistry' 
 
_publ_section_title 
; Deprotonative metalation of five-membered aromatic heterocycles 
using mixed lithium-zinc species 
; 

loop_ 
 _publ_author_name 
 _publ_author_address 
 'UCHIYAMA, Masanobu'
; 
 The Institute of Physical and Chemical Research
 RIKEN
 2-1 Hirosawa, Wako-shi
 Saitama 351-0198, Japan.
;
 'MONGIN, Florence' 
; 
 Synth\`ese et Electrosynth\`ese Organique
 UMR 6510 CNRS, Universit\'e de Rennes 1
 Avenue du G\'en\'eral Leclerc
 35042 Rennes Cedex, France. 
; 
 
_publ_section_abstract 
; 
? 
; 
 
_publ_section_related_literature 
; 
? 
; 
 
_publ_section_comment 
; 
? 
; 
_publ_section_acknowledgements 
; 
? 
; 
_publ_section_figure_captions 
; 
? 
; 
 
 
data_jml016 
_database_code_depnum_ccdc_archive 'CCDC 660902' 
 
_publ_section_exptl_refinement 
# Some potentially useful phrases are donated by Bill Clegg: 
; 
In the absence of significant anomalous scattering, Friedel pairs were 
merged. 
 
The absolute configuration was arbitrarily assigned. 
 
The relatively large ratio of minimum to maximum corrections applied 
in the multiscan process (1:nnn) reflect changes in the illuminated 
volume of the crystal. 
 
Changes in illuminated volume were kept to a minimum, and were 
taken into account (G\"orbitz, 1999) by the multi-scan inter-frame 
scaling (DENZO/SCALEPACK, Otwinowski & Minor, 1997). 
 
 
G\"orbitz, C. H. (1999). Acta Cryst. B55, 1090-1098. 
 
 
 
 
The H atoms were all located in a difference map, but those 
attached to carbon atoms were repositioned geometrically. 
The H atoms were initially refined with soft restraints on the 
bond lengths and angles to regularise their geometry 
(C---H in the range 0.93--0.98, 
N---H in the range 0.86--0.89 
N---H to 0.86 
O---H = 0.82 
\%A) 
and 
U~iso~(H) (in the range 1.2-1.5 times U~eq~ of the parent atom), 
after which the positions were refined with riding constraints. 
 
; 
 
_publ_section_exptl_prep 
# Brief details or a reference. Include solvent if known 
; 
? 
; 
 
# Hand-made tables can be put in the cif. The number of columns 
# is set in the loop header. 
# The contants of each column can either be a piece of text 
# without any spaces (eg a number) or other text enclosed in " " 
# Remove the leading # in the following example 
 
#geom_extra_table_head_A 
#; 
#Table 2. 
#Molecular parameters deviating most from MOGUL averages 
#; 
# 
#loop_ 
#_geom_extra_tableA_col_1 
#_geom_extra_tableA_col_2 
#_geom_extra_tableA_col_3 
#_geom_extra_tableA_col_4 
# 
#Parameter "Observed Value" "MOGUL Value" "MOGUL e.s.d" 
#N5-C6-C4 129 124 "7 (\%)" 
#C3-O10-C2 105 109 "2 (\%)" 
#C6-O7 1.25 1.22 ".02 (\%A)" 
# 
# End of 'script/refcif-b.dat' 
#end of refcif 
_cell_length_a                    7.363(4)
_cell_length_b                    13.529(6)
_cell_length_c                    7.998(1)
_cell_angle_alpha                 90
_cell_angle_beta                  117.33(1)
_cell_angle_gamma                 90
_cell_volume                      707.8(5)
 
_symmetry_cell_setting            'Monoclinic' 
_symmetry_space_group_name_H-M    'P 1 21/c 1 ' 
_symmetry_space_group_name_Hall   '-P 2ybc' 
loop_
 _symmetry_equiv_pos_as_xyz
 'x,y,z'
 '-x,-y,-z'
 '-x,y+1/2,-z+1/2'
 'x,-y+1/2,z+1/2'

loop_
_atom_type_symbol
_atom_type_scat_dispersion_real
_atom_type_scat_dispersion_imag
_atom_type_scat_Cromer_Mann_a1
_atom_type_scat_Cromer_Mann_b1
_atom_type_scat_Cromer_Mann_a2
_atom_type_scat_Cromer_Mann_b2
_atom_type_scat_Cromer_Mann_a3
_atom_type_scat_Cromer_Mann_b3
_atom_type_scat_Cromer_Mann_a4
_atom_type_scat_Cromer_Mann_b4
_atom_type_scat_Cromer_Mann_c
_atom_type_scat_source  
 C       0.0033   0.0016   2.3100  20.8439   1.0200  10.2075   1.5886   0.5687
   0.8650  51.6512   0.2156 'International Tables Vol C 4.2.6.8 and 6.1.1.4'
 H       0.0000   0.0000   0.4930  10.5109   0.3229  26.1257   0.1402   3.1424
   0.0408  57.7998   0.0030 'International Tables Vol C 4.2.6.8 and 6.1.1.4'
 N       0.0061   0.0033  12.2126   0.0057   3.1322   9.8933   2.0125  28.9975
   1.1663   0.5826 -11.5290 'International Tables Vol C 4.2.6.8 and 6.1.1.4'
 S       0.1246   0.1234   6.9053   1.4679   5.2034  22.2151   1.4379   0.2536
   1.5863  56.1720   0.8669 'International Tables Vol C 4.2.6.8 and 6.1.1.4'
 I      -0.4742   1.8119  20.1472   4.3470  18.9949   0.3814   7.5138  27.7660
   2.2735  66.8776   4.0712 'International Tables Vol C 4.2.6.8 and 6.1.1.4'
 
 
_cell_formula_units_Z                    4

# Given Formula = C6 H2 I4 N2 S2 
# Dc =      6.32 Fooo =    592.00 Mu =    181.38 M =    673.85
# Found Formula = C3 H1 I2 N1 S1 
# Dc =      3.16 FOOO =    592.00 Mu =     90.69 M =    336.92

_chemical_formula_sum             'C3 H1 I2 N1 S1'
_chemical_formula_moiety          'C3 H1 I2 N1 S1'
_chemical_compound_source                ?
_chemical_formula_weight            336.92
 
 
_cell_measurement_reflns_used     1263
_cell_measurement_theta_min        0.730
_cell_measurement_theta_max        27.878
_cell_measurement_temperature          295
 
_exptl_crystal_description        'block' 
_exptl_crystal_colour             'colorless' 
_exptl_crystal_size_min           0.08 
_exptl_crystal_size_mid           0.09 
_exptl_crystal_size_max           0.13 
 
_exptl_crystal_density_diffrn     3.162 
_exptl_crystal_density_meas       ? 
_exptl_crystal_density_method     'not measured' 
# Non-dispersive F(000): 
_exptl_crystal_F_000              592 
_exptl_absorpt_coefficient_mu     9.069 
 
# Sheldrick geometric approximatio 0.44 0.48 
_exptl_absorpt_correction_type    refdelf 
_exptl_absorpt_process_details    'DIFABS (Walker & Stuart, 1983)' 
_exptl_absorpt_correction_T_min   0.24 
_exptl_absorpt_correction_T_max   0.48 
# For a Kappa CCD, set Tmin to 1.0 and 
# Tmax to the ratio of max:min frame scales in scale_all.log 
_diffrn_measurement_device_type   'Nonius KappaCCD' 
_diffrn_radiation_monochromator   'graphite' 
_diffrn_radiation_type            'Mo K\a'
_diffrn_radiation_wavelength           0.71069
_diffrn_measurement_method        '\f & \w scans' 
 
# If a reference occurs more than once, delete the author 
# and date from subsequent references. 
_computing_data_collection        'COLLECT (Nonius, 1997-2001).' 
_computing_cell_refinement        'DENZO/SCALEPACK (Otwinowski & Minor, 1997)' 
_computing_data_reduction         'DENZO/SCALEPACK (Otwinowski & Minor, 1997)' 
_computing_structure_solution     'SIR97 (Altomare et al., 1999)' 
_computing_structure_refinement   'CRYSTALS (Betteridge et al., 2003)' 
_computing_publication_material   'CRYSTALS (Betteridge et al., 2003)' 
_computing_molecular_graphics     'CAMERON (Watkin et al., 1996)' 
 
_diffrn_standards_interval_time   . 
_diffrn_standards_interval_count  . 
_diffrn_standards_number          0 
_diffrn_standards_decay_%         ? 
 
_diffrn_ambient_temperature        295
_diffrn_reflns_number             3390 
_reflns_number_total              1720 
_diffrn_reflns_av_R_equivalents   0.079 
# Number of reflections with Friedels Law is 1720 
# Number of reflections without Friedels Law is 0 
# Theoretical number of reflections is about 1583 
 
 
_diffrn_reflns_theta_min          3.011 
_diffrn_reflns_theta_max          28.416 
_diffrn_measured_fraction_theta_max 0.968 
 
_diffrn_reflns_theta_full         26.996 
_diffrn_measured_fraction_theta_full 0.987 
 
 
_diffrn_reflns_limit_h_min        0 
_diffrn_reflns_limit_h_max        9 
_diffrn_reflns_limit_k_min        -17 
_diffrn_reflns_limit_k_max        17 
_diffrn_reflns_limit_l_min        -10 
_diffrn_reflns_limit_l_max        9 
_reflns_limit_h_min               -9 
_reflns_limit_h_max               8 
_reflns_limit_k_min               0 
_reflns_limit_k_max               17 
_reflns_limit_l_min               0 
_reflns_limit_l_max               10 
 
_oxford_diffrn_Wilson_B_factor    0.00 
_oxford_diffrn_Wilson_scale       0.00 
 
_atom_sites_solution_primary      direct #heavy,direct,difmap,geom
# _atom_sites_solution_secondary  difmap
_atom_sites_solution_hydrogens    geom
 
_refine_diff_density_min          -1.52 
_refine_diff_density_max          1.11 
 
 
# The current dictionary definitions do not cover the 
# situation where the reflections used for refinement were 
# selected by a user-defined sigma threshold 
 
 
# The values actually used during refinement 
_oxford_reflns_threshold_expression_ref     I>3.0\s(I)
_refine_ls_number_reflns          926 
_refine_ls_number_restraints      0 
_refine_ls_number_parameters      64 
_oxford_refine_ls_R_factor_ref    0.0549 
_refine_ls_wR_factor_ref          0.0637 
_refine_ls_goodness_of_fit_ref    1.1060 
_refine_ls_shift/su_max           0.000248 
 
 
# The values computed from all data 
_oxford_reflns_number_all         1715 
_refine_ls_R_factor_all           0.0796 
_refine_ls_wR_factor_all          0.0835 
 
# The values computed with a 2 sigma cutoff - a la SHELX 
_reflns_threshold_expression      I>2.0\s(I)
_reflns_number_gt                 1069 
_refine_ls_R_factor_gt            0.0585 
_refine_ls_wR_factor_gt           0.0673 
 
# choose from: rm (reference molecule of known chirality), 
# ad (anomolous dispersion - Flack), rmad (rm and ad), 
# syn (from synthesis), unk (unknown) or . (not applicable). 
_chemical_absolute_configuration  '.' 
 
 
_refine_ls_structure_factor_coef  F 
_refine_ls_matrix_type            full
_refine_ls_hydrogen_treatment     constr         # none, undef, noref, refall,
                                                 # refxyz, refU, constr or mixed
_refine_ls_weighting_scheme       calc 
_refine_ls_weighting_details 
;
 Method, part 1, Chebychev polynomial, (Watkin, 1994, Prince, 1982) 
 [weight] = 1.0/[A~0~*T~0~(x)+A~1~*T~1~(x) ... +A~n-1~]*T~n-1~(x)] 
 where A~i~ are the Chebychev coefficients listed below and x= Fcalc/Fmax 
 Method = Robust Weighting (Prince, 1982) 
 W = [weight] * [1-(deltaF/6*sigmaF)^2^]^2^ 
 A~i~ are: 
 2.31 0.631 1.53 
;
# Insert your own references if required - in alphabetical order 
_publ_section_references 
; 
Altomare, A., Burla, M.C., Camalli, M., Cascarano, G.L., Giacovazzo, C., 
Guagliardi, A., Grazia, A., Moliterni, G., Polidori, G. & Spagna, R. 
(1999). J. App. Cryst. 32, 115-119. 
 
Betteridge, P.W., Carruthers, J.R., Cooper, R.I., 
Prout, K. & Watkin, D.J. (2003). J. Appl. Cryst. 36, 1487. 
 
Nonius (1997-2001). COLLECT. Nonius BV, Delft, The Netherlands. 
 
Otwinowski, Z. & Minor, W. (1997). Methods in Enzymology, Vol. 276, 
edited by C. W. Carter Jr & R. M. Sweet, pp. 307--326. 
New York: Academic Press. 
 
Prince, E. 
Mathematical Techniques in Crystallography 
and Materials Science 
Springer-Verlag, New York, 1982. 
 
Walker, N., & Stuart, (1983). D. Acta Cryst, A39, 158-166. 
 
Watkin D.J. (1994). 
Acta Cryst, A50, 411-437. 
 
Watkin, D.J., Prout, C.K. & Pearce, L.J. (1996). CAMERON, Chemical 
Crystallography Laboratory, Oxford, UK. 
; 

# Uequiv = arithmetic mean of Ui i.e. Ueqiv = (U1+U2+U3)/3

# Replace last . with number of unfound hydrogen atomsattached to an atom.

# ..._refinement_flags_... 
# . no refinement constraints           S special position constraint on site
# G rigid group refinement of site      R riding atom
# D distance or angle restraint on site T thermal displacement constraints
# U Uiso or Uij restraint (rigid bond)  P partial occupancy constraint


loop_
_atom_site_label
_atom_site_type_symbol
_atom_site_fract_x
_atom_site_fract_y
_atom_site_fract_z
_atom_site_U_iso_or_equiv
_atom_site_occupancy
_atom_site_adp_type
_atom_site_refinement_flags_posn
_atom_site_refinement_flags_adp
_atom_site_refinement_flags_occupancy
_atom_site_disorder_assembly
_atom_site_disorder_group
_oxford_atom_site_special_shape
_atom_site_attached_hydrogens
I1 I 0.99305(11) 0.55037(6) 0.75064(10) 0.0545 1.0000 Uani . . . . . . . 
I2 I 0.41314(14) 0.17450(7) 0.63553(14) 0.0719 1.0000 Uani . . . . . . . 
S1 S 0.6175(5) 0.3955(2) 0.6934(4) 0.0578 1.0000 Uani . . . . . . . 
C2 C 0.8513(16) 0.4141(9) 0.6964(15) 0.0500 1.0000 Uani . . . . . . . 
N1 N 0.8043(14) 0.2466(7) 0.6494(14) 0.0554 1.0000 Uani . . . . . . . 
C3 C 0.6399(17) 0.2719(8) 0.6595(15) 0.0516 1.0000 Uani . . . . . . . 
C1 C 0.923(2) 0.3282(9) 0.6700(18) 0.0590 1.0000 Uani . . . . . . . 
H11 H 1.0406 0.3244 0.6543 0.0560 1.0000 Uiso R . . . . . . 
loop_
_atom_site_aniso_label
_atom_site_aniso_U_11
_atom_site_aniso_U_22
_atom_site_aniso_U_33
_atom_site_aniso_U_23
_atom_site_aniso_U_13
_atom_site_aniso_U_12
I1 0.0570(5) 0.0554(5) 0.0535(5) -0.0018(3) 0.0273(4) -0.0046(3) 
I2 0.0638(6) 0.0746(6) 0.0707(6) 0.0014(4) 0.0251(4) -0.0180(4) 
S1 0.0558(16) 0.0587(17) 0.0639(17) -0.0035(13) 0.0317(14) -0.0002(13) 
C2 0.050(6) 0.057(6) 0.043(5) 0.001(4) 0.022(5) -0.007(5) 
N1 0.052(5) 0.056(6) 0.054(6) 0.008(4) 0.021(4) 0.006(4) 
C3 0.055(7) 0.055(6) 0.040(6) -0.003(5) 0.017(5) -0.005(5) 
C1 0.070(8) 0.060(7) 0.065(7) 0.011(6) 0.047(7) 0.012(6) 

_refine_ls_extinction_method 
    'None'
_oxford_refine_ls_scale 0.725(4) 
loop_
 _geom_bond_atom_site_label_1
 _geom_bond_site_symmetry_1
 _geom_bond_atom_site_label_2
 _geom_bond_site_symmetry_2
 _geom_bond_distance
 _geom_bond_publ_flag
I1 . C2 . 2.064(11)    yes
I2 . C3 . 2.065(11)    yes
S1 . C2 . 1.729(11)    yes
S1 . C3 . 1.715(11)    yes
C2 . C1 . 1.334(16)    yes
N1 . C3 . 1.295(15)    yes
N1 . C1 . 1.370(16)    yes
C1 . H11 . 0.931    no
loop_
 _geom_angle_atom_site_label_1
 _geom_angle_site_symmetry_1
 _geom_angle_atom_site_label_2
 _geom_angle_site_symmetry_2
 _geom_angle_atom_site_label_3
 _geom_angle_site_symmetry_3
 _geom_angle
 _geom_angle_publ_flag
C2 . S1 . C3 . 88.7(6)    yes
S1 . C2 . I1 . 122.5(6)    yes
S1 . C2 . C1 . 109.6(9)    yes
I1 . C2 . C1 . 127.8(9)    yes
C3 . N1 . C1 . 110.1(10)    yes
S1 . C3 . I2 . 120.3(6)    yes
S1 . C3 . N1 . 115.3(9)    yes
I2 . C3 . N1 . 124.4(8)    yes
N1 . C1 . C2 . 116.3(11)    yes
N1 . C1 . H11 . 121.4    no
C2 . C1 . H11 . 122.0    no
